# Supplementary material for: Surface engineering of titanium alloy using metal-polyphenol network coating with magnesium ions for improved osseointegration
Source: Royal Society of Chemistry journal article supplement (doi:10.1039/d0bm00566e), 2020-01-01
Supplement: d0bm00566e1.pdf [file d0bm00566e1.pdf]

Supplementary Figure S1. Characterization of E-Ti1. (a) Water contact angle, (b) XPS general spectra.

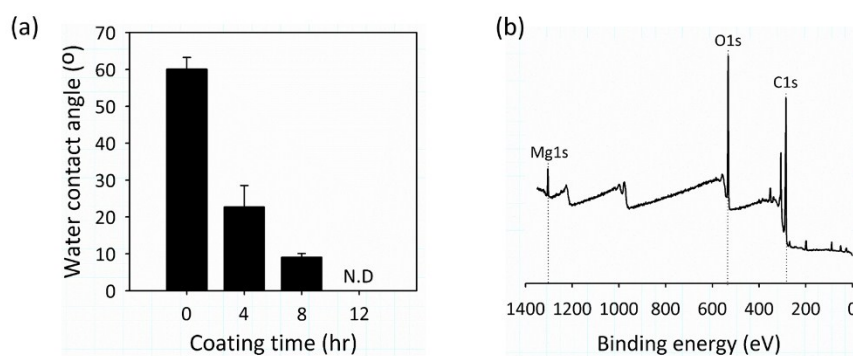

Supplementary Figure S1.
